# Supplementary material for: The Regulation of Neutrophil Extracellular Trap–induced Tissue Damage by Human CD177
Source: PubMed Central journal article supplement — Transplant Direct. 2021 Jul 23;7(8):e734. doi: 10.1097/TXD.0000000000001175 (PMC8439991; doi:10.1097/txd.0000000000001175), 2021-07-23
Supplement: txd-7-e734-s001.pdf [file txd-7-e734-s001.pdf]

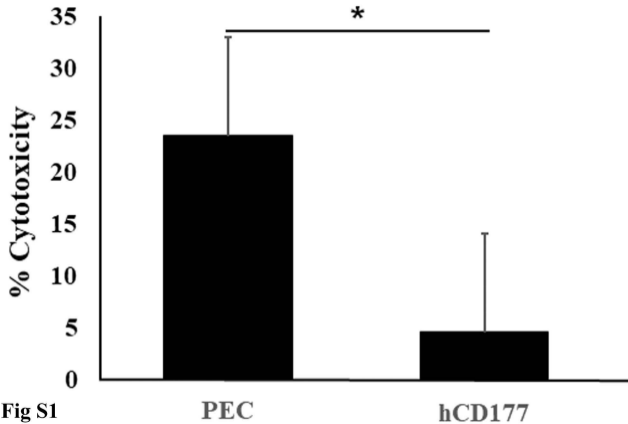

Fig S1

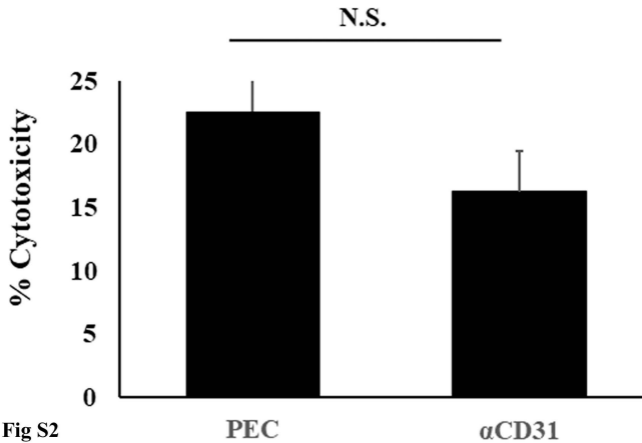

Fig S2

PR3 ( $\mu\text{g/ml}$ )

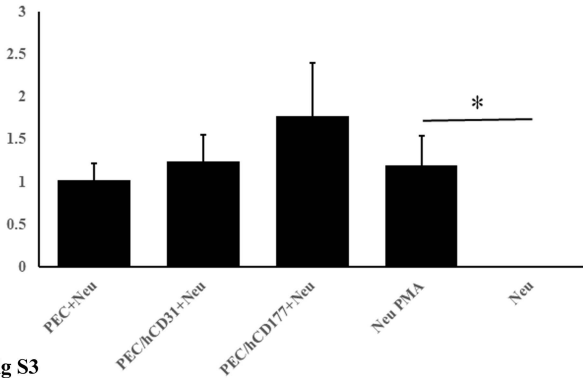

**Fig S3**

Fig S1 hCD177 induced the neutrophil-mediated cytotoxicity in 4 different donors.

PEC and PEC/hCD177 were plated at a concentration of  $6 \times 10^4$  cells/well as target cells in a 24-well culture plate. PEC and PEC/hCD177 were co-cultured with  $3 \times 10^5$  neutrophils from 4 different donors for 2h in the presence of 200 nmol/L PMA. FACS analysis and calculation of neutrophil-induced cytotoxicity have been done as Fig2. \*;  $P < 0.05$ ,  $n = 4$  (different donors)

Fig S2 Anti-human CD31 antibody does not affect neutrophil-mediated cytotoxicity against PEC.

PEC was plated at a concentration of  $6 \times 10^4$  cells/well as target cells in a 24-well culture plate and co-cultured with  $3 \times 10^5$  neutrophils in the absence (PEC) or presence of 200  $\mu$ g/ml anti-human CD31 ( $\alpha$  CD31) for 2h in the presence of 200 nmol/L PMA. FACS analysis and calculation of neutrophil-induced cytotoxicity have been done as Fig2. \*;  $P < 0.05$ ,  $n = 4$

Fig S3 Human CD177 and CD31 does not affect PR3 release from neutrophil.

PEC or PEC/hCD177 were seeded in 24well plates at a concentration of sixty thousand cells/well. After 24 h,  $3 \times 10^5$  neutrophils were added to each well. After co-culturing for 3 h in the presence of 200 nmol/L PMA, the culture supernatant was collected and the concentration of PR3 in the culture media was measured with the human PR3 SimpleStep® ELISA kit (Abcam, Cambridge, UK). Supernatants of neutrophils cultured for 24hours in the presence (Neu PMA) or absence

(Neu) of 200nmol/L PMA were used as negative controls. No difference was observed in the release of PR3 from neutrophils co-cultured with PEC/hCD177 and PEC/hCD31 compared to Neu PMA. All results for values of human PR3 concentrations are presented as the mean  $\pm$  SEM,

\*;  $p < 0.05$ ,  $n = 6$ .
